# Supplementary material for: Data Mining of Prognostic Microenvironment-Related Genes in Clear Cell Renal Cell Carcinoma: A Study with TCGA Database
Source: Hindawi journal article supplement (doi:10.1155/2019/8901649), 2019-10-30
Supplement: f1 [file 8901649.f1.pdf]

Supplemental Table 1. Gene Ontology analysis of 89 overlapping DEGs

| GO | terms                                           | GeneRatio | Count | p.adjust    |
|----|-------------------------------------------------|-----------|-------|-------------|
| BP | humoral immune response                         | 349/18493 | 10    | 0.002467333 |
| BP | B cell proliferation                            | 91/18493  | 6     | 0.002467333 |
| BP | leukocyte proliferation                         | 283/18493 | 9     | 0.002467333 |
| BP | cell chemotaxis                                 | 295/18493 | 9     | 0.002591478 |
| BP | cellular response to tumor necrosis factor      | 235/18493 | 8     | 0.00270804  |
| BP | monocyte chemotaxis                             | 64/18493  | 5     | 0.00270804  |
| BP | bone mineralization involved in bone maturation | 11/18493  | 3     | 0.00298566  |
| BP | negative regulation of bone development         | 11/18493  | 3     | 0.00298566  |
| BP | response to tumor necrosis factor               | 257/18493 | 8     | 0.003407588 |
| BP | lymphocyte proliferation                        | 264/18493 | 8     | 0.003570846 |
| BP | mononuclear cell proliferation                  | 266/18493 | 8     | 0.003570846 |
| BP | mononuclear cell migration                      | 85/18493  | 5     | 0.005421627 |
| BP | chemokine-mediated signaling pathway            | 87/18493  | 5     | 0.005599111 |
| BP | leukocyte chemotaxis                            | 217/18493 | 7     | 0.00606826  |
| BP | response to chemokine                           | 95/18493  | 5     | 0.00641872  |
| BP | cellular response to chemokine                  | 95/18493  | 5     | 0.00641872  |
| BP | glucocorticoid biosynthetic process             | 18/18493  | 3     | 0.00641872  |
| BP | ossification involved in bone maturation        | 18/18493  | 3     | 0.00641872  |
| BP | bone maturation                                 | 20/18493  | 3     | 0.008441835 |
| BP | leukocyte apoptotic process                     | 107/18493 | 5     | 0.00977991  |
| BP | negative regulation of immune system process    | 437/18493 | 9     | 0.010704336 |
| BP | animal organ maturation                         | 24/18493  | 3     | 0.012225896 |
| BP | regulation of bone development                  | 24/18493  | 3     | 0.012225896 |
| BP | lymphocyte chemotaxis                           | 63/18493  | 4     | 0.012741324 |
| BP | glucocorticoid metabolic process                | 25/18493  | 3     | 0.012741324 |
| BP | regulation of lymphocyte activation             | 472/18493 | 9     | 0.015384142 |

|    |                                                                                                                                         |           |   |             |
|----|-----------------------------------------------------------------------------------------------------------------------------------------|-----------|---|-------------|
| BP | negative regulation of immune response                                                                                                  | 131/18493 | 5 | 0.018354427 |
| BP | cell-cell recognition                                                                                                                   | 72/18493  | 4 | 0.018354427 |
| BP | B cell activation                                                                                                                       | 303/18493 | 7 | 0.021829088 |
| BP | regulation of leukocyte proliferation                                                                                                   | 216/18493 | 6 | 0.021829088 |
| BP | regulation of T cell activation                                                                                                         | 305/18493 | 7 | 0.021829088 |
| BP | animal organ regeneration                                                                                                               | 78/18493  | 4 | 0.021829088 |
| BP | regulation of adaptive immune response based on somatic recombination of immune receptors built from immunoglobulin superfamily domains | 144/18493 | 5 | 0.023641456 |
| BP | hormone biosynthetic process                                                                                                            | 84/18493  | 4 | 0.027244111 |
| BP | regulation of leukocyte apoptotic process                                                                                               | 87/18493  | 4 | 0.030229446 |
| BP | regulation of adaptive immune response                                                                                                  | 157/18493 | 5 | 0.032129966 |
| BP | receptor-mediated endocytosis                                                                                                           | 346/18493 | 7 | 0.036395478 |
| BP | positive regulation of cell-cell adhesion                                                                                               | 251/18493 | 6 | 0.036395478 |
| BP | establishment of T cell polarity                                                                                                        | 10/18493  | 2 | 0.036395478 |
| BP | dendritic cell antigen processing and presentation                                                                                      | 10/18493  | 2 | 0.036395478 |
| BP | dendritic cell apoptotic process                                                                                                        | 10/18493  | 2 | 0.036395478 |
| BP | regulation of dendritic cell apoptotic process                                                                                          | 10/18493  | 2 | 0.036395478 |
| BP | positive regulation of protein kinase B signaling                                                                                       | 168/18493 | 5 | 0.036508724 |
| BP | neutrophil chemotaxis                                                                                                                   | 101/18493 | 4 | 0.040499856 |
| BP | establishment of lymphocyte polarity                                                                                                    | 11/18493  | 2 | 0.040499856 |
| BP | creatine metabolic process                                                                                                              | 11/18493  | 2 | 0.040499856 |
| BP | antibacterial humoral response                                                                                                          | 47/18493  | 3 | 0.043691536 |
| BP | leukocyte migration                                                                                                                     | 478/18493 | 8 | 0.043691536 |
| BP | lymphocyte migration                                                                                                                    | 105/18493 | 4 | 0.043691536 |
| BP | developmental maturation                                                                                                                | 271/18493 | 6 | 0.043933972 |
| BP | positive regulation of leukocyte activation                                                                                             | 372/18493 | 7 | 0.043933972 |
| BP | regulation of leukocyte chemotaxis                                                                                                      | 109/18493 | 4 | 0.046862642 |
| BP | immunological synapse formation                                                                                                         | 13/18493  | 2 | 0.046862642 |

|    |                                                            |           |   |             |
|----|------------------------------------------------------------|-----------|---|-------------|
| BP | negative regulation of immune effector process             | 111/18493 | 4 | 0.046862642 |
| BP | positive regulation of receptor-mediated endocytosis       | 51/18493  | 3 | 0.046862642 |
| BP | negative regulation of leukocyte apoptotic process         | 51/18493  | 3 | 0.046862642 |
| BP | positive regulation of cell activation                     | 384/18493 | 7 | 0.046862642 |
| BP | neutrophil migration                                       | 112/18493 | 4 | 0.046862642 |
| BP | steroid biosynthetic process                               | 193/18493 | 5 | 0.04847223  |
| BP | regulation of ossification                                 | 193/18493 | 5 | 0.04847223  |
| BP | protein activation cascade                                 | 194/18493 | 5 | 0.048773173 |
| BP | complement activation, alternative pathway                 | 14/18493  | 2 | 0.049293986 |
| BP | T cell costimulation                                       | 54/18493  | 3 | 0.049647673 |
| BP | antimicrobial humoral response                             | 118/18493 | 4 | 0.049647673 |
| BP | lymphocyte costimulation                                   | 55/18493  | 3 | 0.049647673 |
| BP | regulation of leukocyte cell-cell adhesion                 | 293/18493 | 6 | 0.049647673 |
| BP | myeloid leukocyte migration                                | 199/18493 | 5 | 0.049647673 |
| CC | external side of plasma membrane                           | 359/19659 | 8 | 0.036152847 |
| MF | CCR chemokine receptor binding                             | 43/17632  | 4 | 0.0048119   |
| MF | cytokine activity                                          | 219/17632 | 7 | 0.0048119   |
| MF | chemokine activity                                         | 49/17632  | 4 | 0.0048119   |
| MF | chemokine receptor binding                                 | 66/17632  | 4 | 0.009639388 |
| MF | cytokine receptor binding                                  | 281/17632 | 7 | 0.009639388 |
| MF | alpha-tubulin binding                                      | 34/17632  | 3 | 0.01772548  |
| MF | anion transmembrane transporter activity                   | 330/17632 | 7 | 0.01822859  |
| MF | serine-type endopeptidase activity                         | 250/17632 | 6 | 0.021776712 |
| MF | receptor ligand activity                                   | 478/17632 | 8 | 0.0236094   |
| MF | serine-type peptidase activity                             | 273/17632 | 6 | 0.0236094   |
| MF | serine hydrolase activity                                  | 277/17632 | 6 | 0.0236094   |
| MF | voltage-gated chloride channel activity                    | 12/17632  | 2 | 0.0236094   |
| MF | peroxisome proliferator activated receptor binding         | 12/17632  | 2 | 0.0236094   |
| MF | phosphotransferase activity, nitrogenous group as acceptor | 13/17632  | 2 | 0.025838687 |

---

|    |                                      |           |   |             |
|----|--------------------------------------|-----------|---|-------------|
| MF | growth factor receptor binding       | 132/17632 | 4 | 0.042231687 |
| MF | voltage-gated anion channel activity | 18/17632  | 2 | 0.043750023 |

---

GO; Gene Ontology, DEGs; differentially expressed genes, BP; Biological Process, CC; Cellular Component, MF; Molecular Function

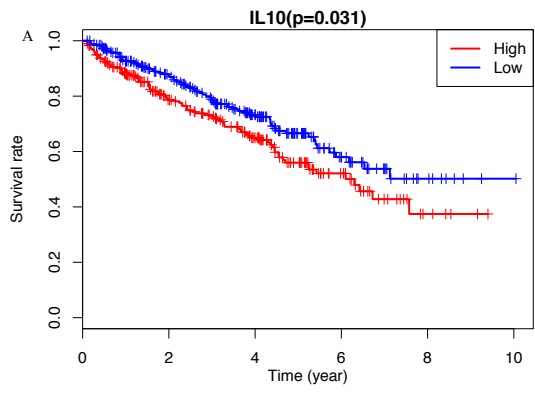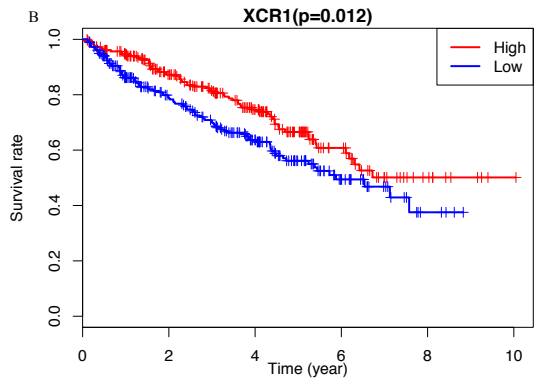

Supplemental Figure 1. Prognostic values for overall survival. (A) IL10. (B) XCR1.

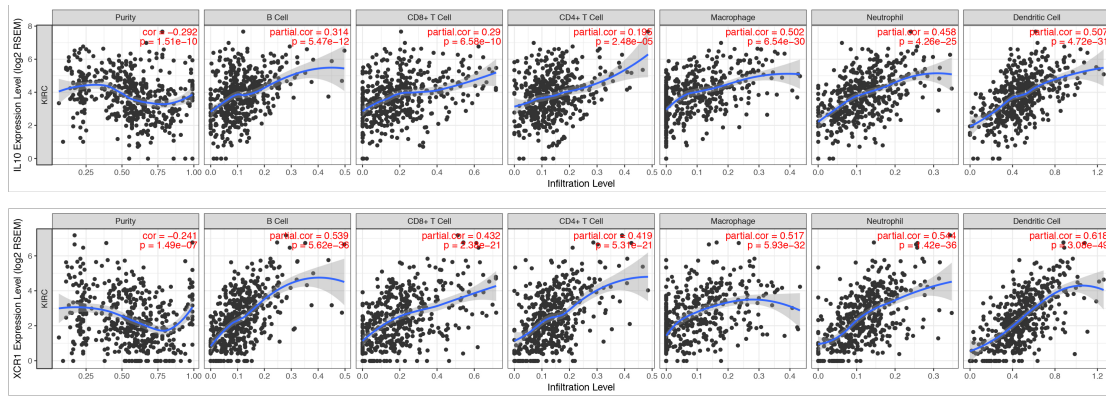

Supplemental Figure 2. The relationship between hub genes and tumor infiltrating immune cells (B cell, CD4 T cell, CD8 T cell, neutrophil, macrophage and dendritic cell).
